# Supplementary material for: USP21 deubiquitinase promotes pancreas cancer cell stemness via Wnt pathway activation
Source: PubMed Central journal article supplement — Genes Dev. 2019 Oct 1;33(19-20):1361–6. doi: 10.1101/gad.326314.119 (PMC6771391; doi:10.1101/gad.326314.119), 2019-10-01
Supplement: supp_gad.326314.119_Supplemental_Materials.pdf [file supp_gad.326314.119_Supplemental_Materials.pdf]

## **USP21 deubiquitinase promotes pancreas cancer cell stemness via Wnt pathway activation**

Pingping Hou, Xingdi Ma, Qiang Zhang, Chang-Jiun Wu, Wenting Liao, Jun Li, Huamin Wang, Jun Zhao, Xin Zhou, Carolyn Guan, Jeffery Ackroyd, Shan Jiang, Jianhua Zhang, Denise J. Spring, Y. Alan Wang, and Ronald A. DePinho

### **Supplemental Materials**

Supplemental Figures S1-6

Supplemental Tables S1-2

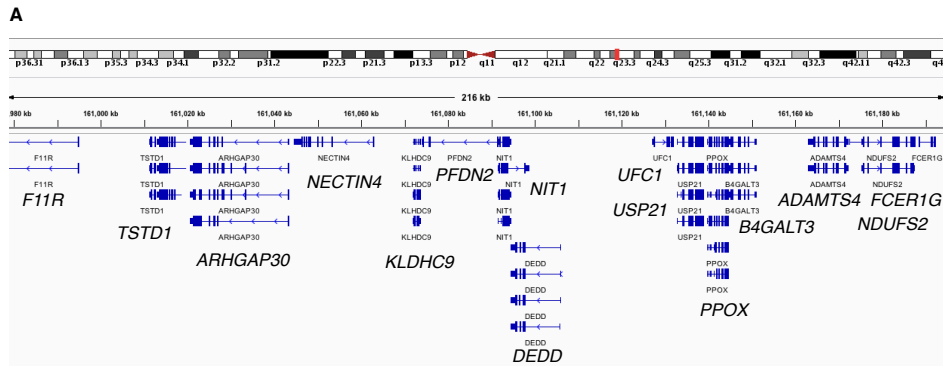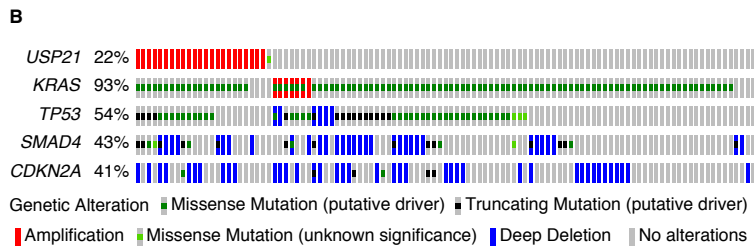

**Supplemental Fig. S1.** Genetic analysis of *USP21* in human PDAC data-sets. **(A)** Genes located in the minimal common region of the *USP21* amplicon. **(B)** Genetic alterations of *USP21* and other common driver genetic events in PDAC (UTSW dataset).

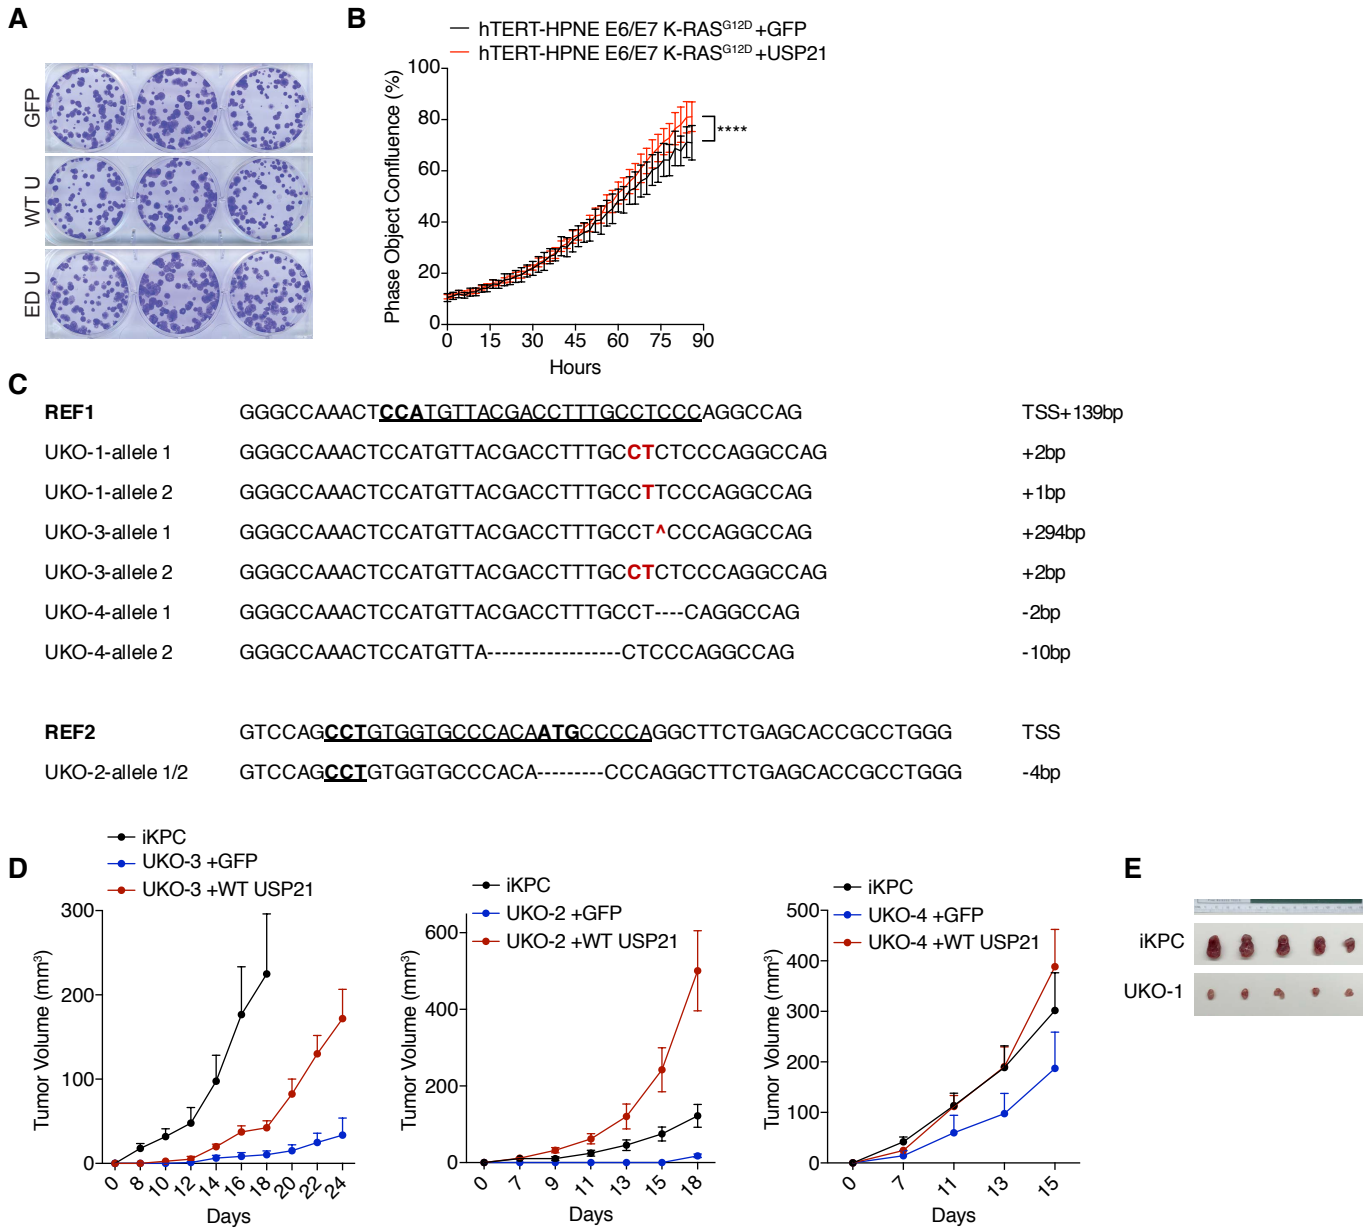

**Supplemental Fig. S2.** Functional analysis of USP21. (A) Colony formation assay comparing GFP, WT-USP21 (WT U) and ED-USP21 (ED U) OE iKPC cells. 500 cells per well were seeded in 6-well plates and stained with crystal violet after 1 week. (B) Cell proliferation comparing GFP and WT-USP21 OE hTERT-HPNE E6/E7-KRAS<sup>G12D</sup> cells (n=6). (C) The sgRNA design to knockout *Usp21* in iKPC cells by CRISPR/Cas9. (D) Knockout of *Usp21* impaired iKPC tumor growth *in vivo* (n=5). (E) Comparison of the tumor sizes generated from iKPC cells and UKO-1 cells. For B and D, data are represented as mean ± SEM.

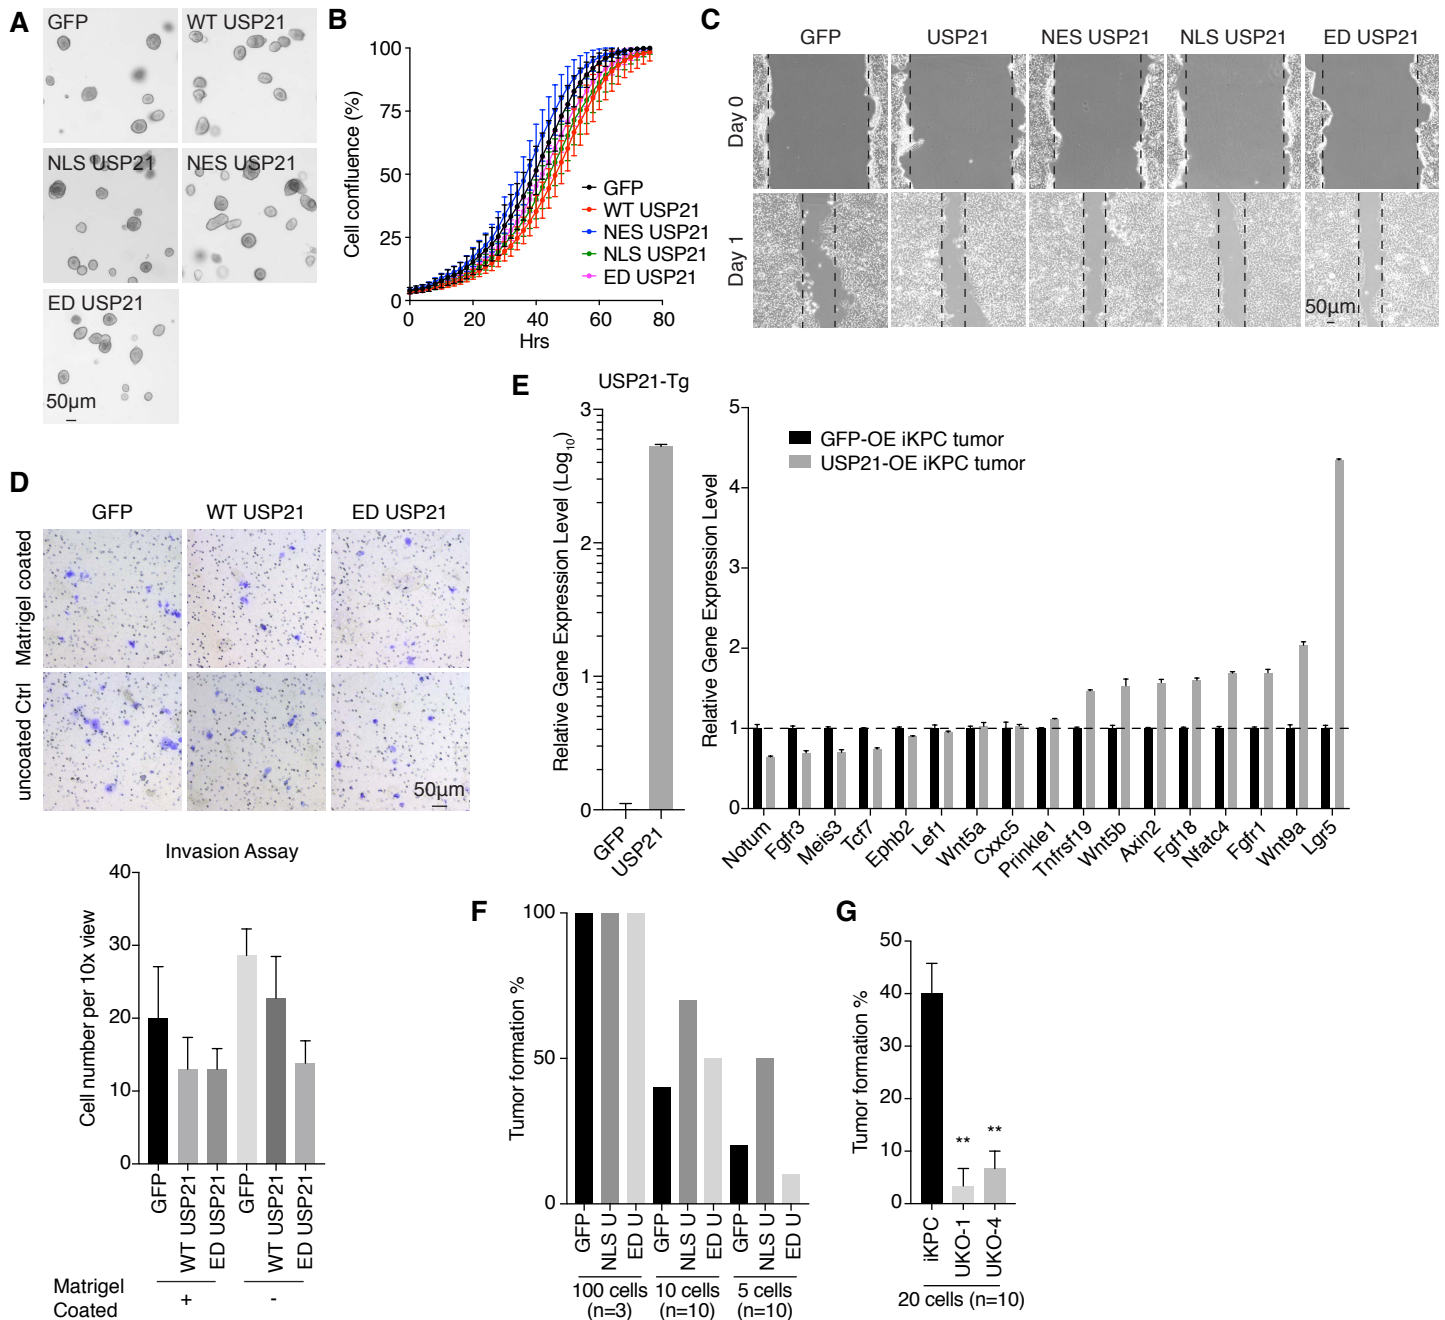

**Supplemental Fig. S3.** Comparison of tumorigenic functions between USP21 variants. (A-C) Spheroid colony formation in 3-D culture (A), cell proliferation assay (B) and cell migration assay (C) comparing iKPC cells overexpressing GFP and USP21 variants. (D) Cell invasion assay comparing GFP, WT- and ED-USP21 OE iKPC cells. Representative images of crystal violet staining of invaded cells and quantification were shown. (E) RT-PCR analysis of Wnt pathway genes comparing GFP and WT-USP21 OE iKPC tumors. (F) Limited dilution assay comparing GFP, NLS-USP21 (NLS U) and ED-USP21 (ED U) OE iKPC cells. 100, 10 and 5 cells were injected to compare the tumor formation rate. (G) Limited dilution assay comparing tumor formation capacity from 20 cells between *Usp21* WT and KO iKPC cells. n=3 independent experiments. For B and G, data are represented as mean ± SEM. For D and E, data are represented as mean ± SD.



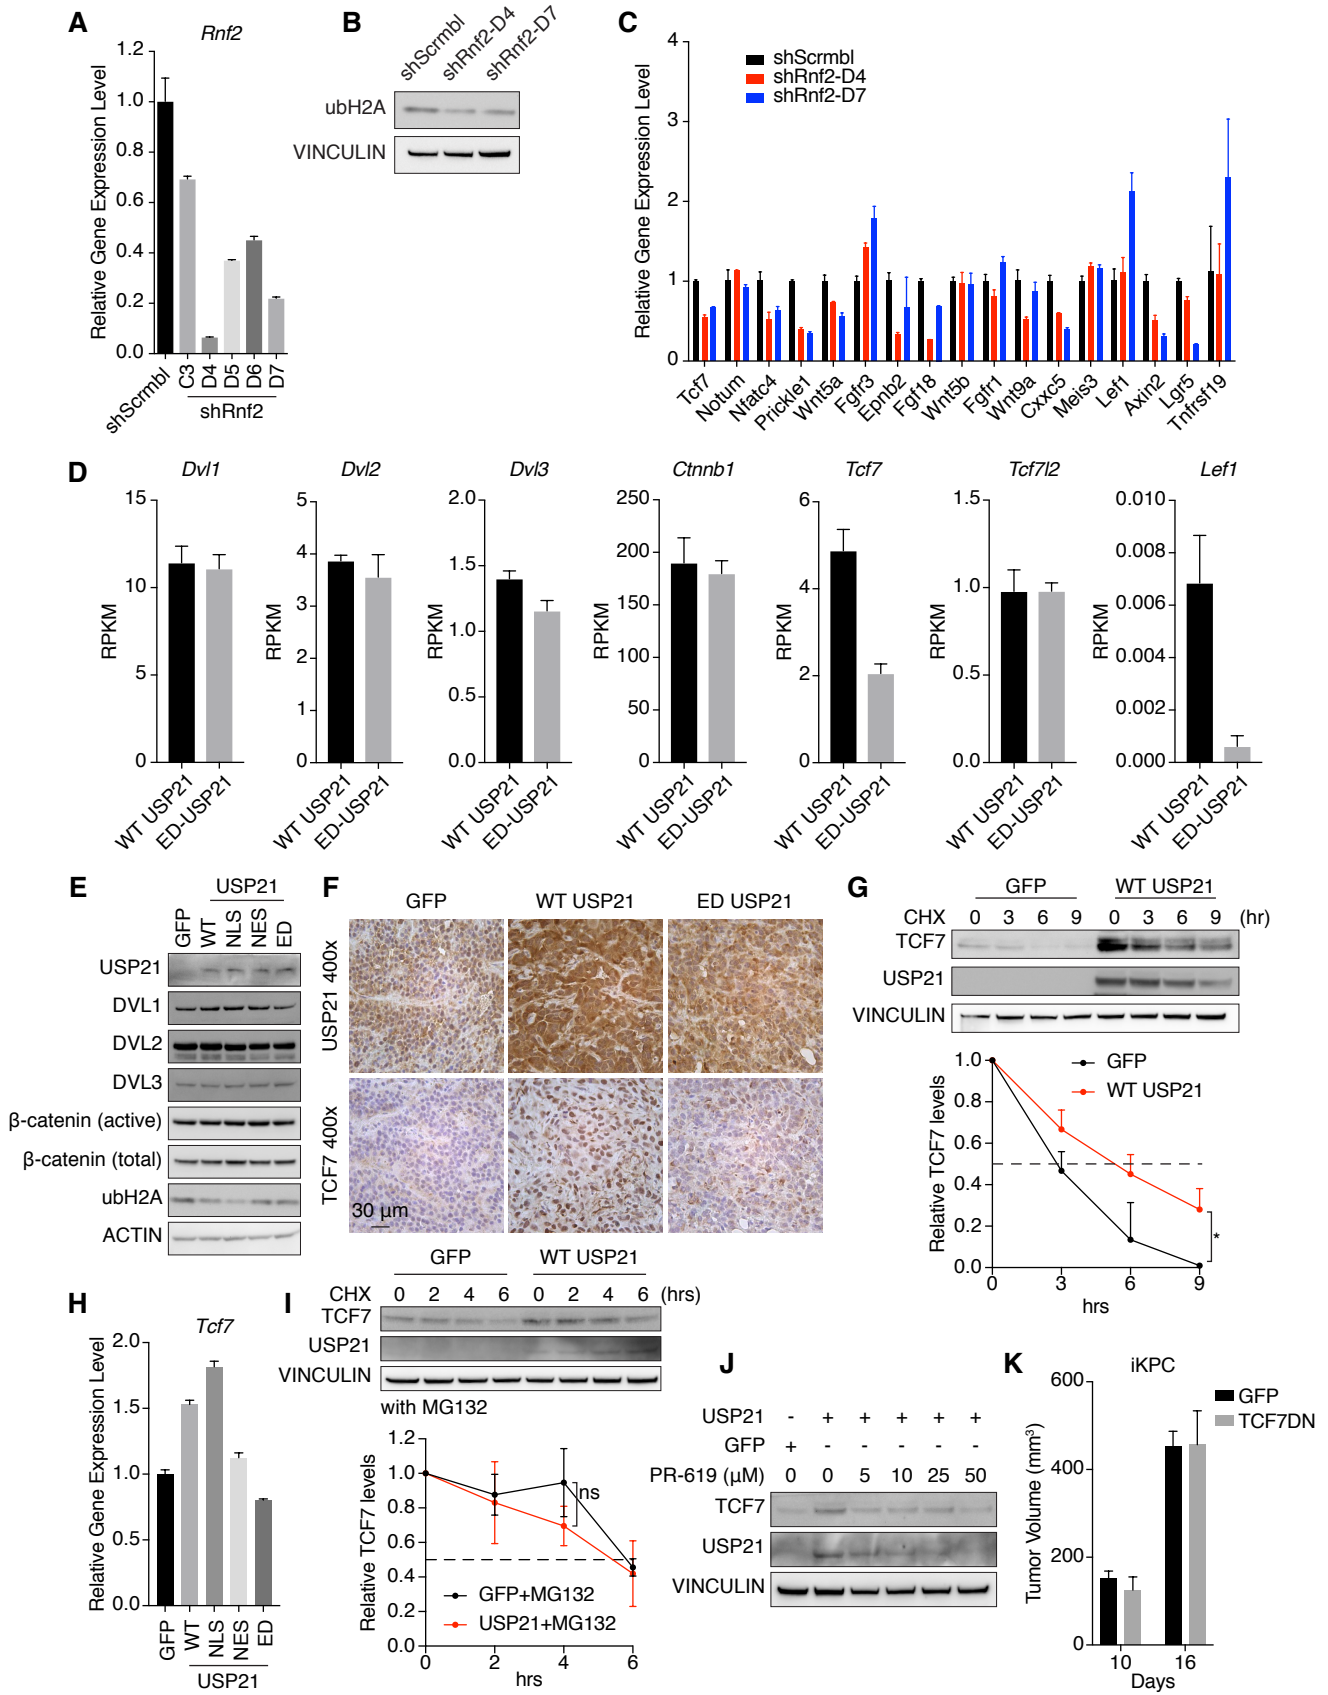

**Supplemental Fig. S4. USP21 activates Wnt pathway genes via TCF7 and independent of ubH2A deubiquitination.** (A) Validation of *Rnf2* knockdown by shRNA (n=3). (B) Western blot analysis of ubH2A after *Rnf2* knockdown in iKPC cells. (C) RT-PCR analysis of Wnt pathway genes comparing scramble control and *Rnf2* knockdown in iKPC cells (n=3). (D) Reads Per Kilobase of transcript, per Million mapped reads (RPKM) of *Dvl1*, *Dvl2*, *Dvl3*, *Cttnb1*, *Tcf7*, *Tcf7l2* and *Lef1* extracted from RNA-seq data comparing WT- and ED-USP21 OE iKPC cells (n=4). (E) Western blot analysis of Wnt pathway proteins and ubH2A comparing iKPC cells overexpressing GFP and USP21 variants. (F) TCF7 protein levels in GFP, WT- and ED-USP21 OE iKPC tumors by IHC. (G) CHX assay of TCF7 in GFP and WT-USP21 OE iKPC cells (n=3). (H) *Tcf7* mRNA levels in iKPC cells overexpressing GFP and USP21 variants (n=3). (I) CHX assay of TCF7 in GFP and WT-USP21 OE iKPC cells with MG132 treatment (n=3). (J) Comparison of TCF7 protein levels in USP21 OE iKPC cells under DUB inhibitor PR-619 treatment at different concentrations. (K) Tumor growth comparison of GFP and TCF7DN OE iKPC cells (n=5). For A-B, and G-I, data are represented as mean  $\pm$  SD. For D and K, data are represented as mean  $\pm$  SEM.

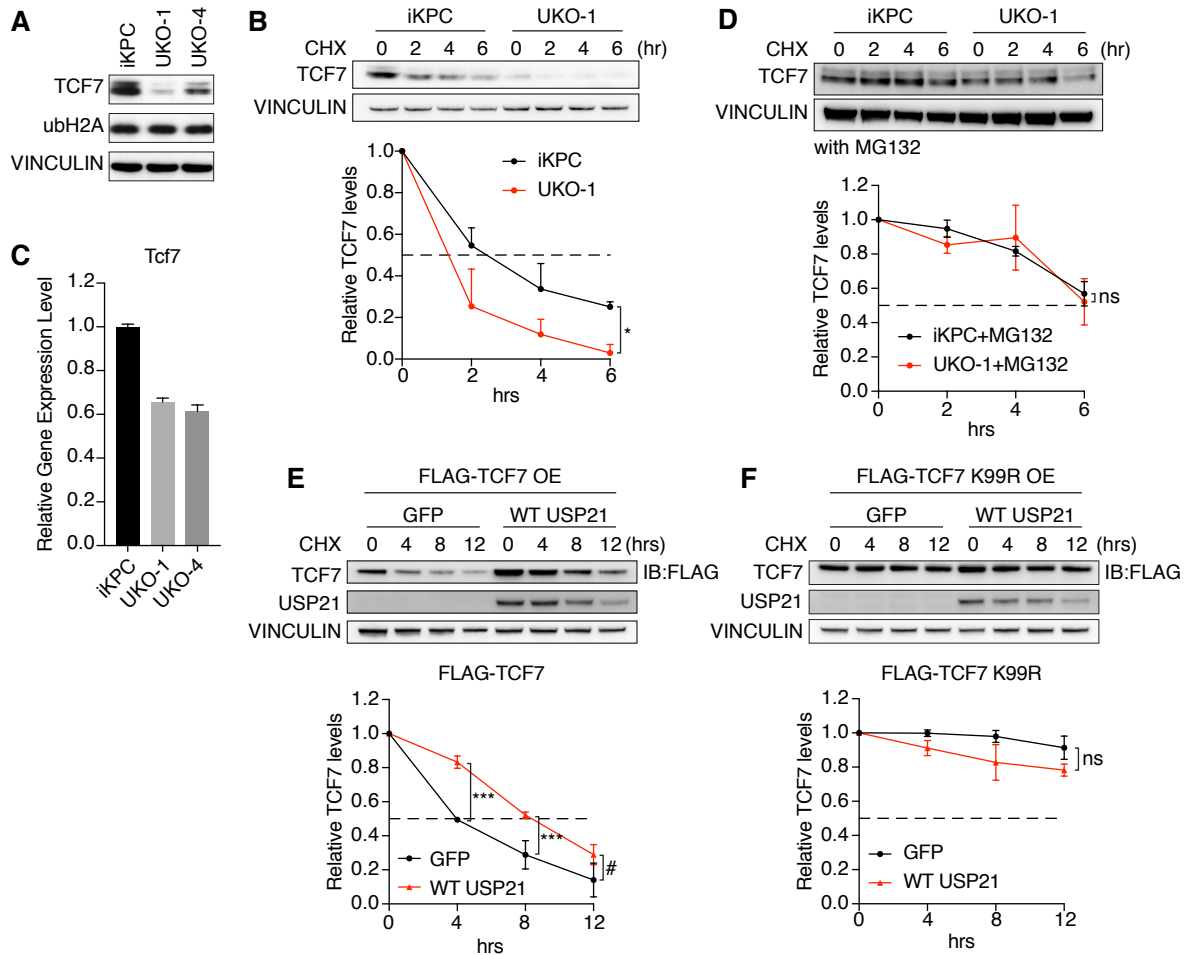

**Supplemental Fig. S5.** Depletion of *Usp21* in iKPC cells destabilizes TCF7 and impairs tumor initiating capacity. (A) TCF7 and ubH2A protein levels in *Usp21* WT and KO iKPC cells by western blot analysis. (B) CHX assay of TCF7 in *Usp21* WT and KO iKPC cells (n=2). (C) *Tcf7* mRNA levels in *Usp21* WT and KO iKPC cells by RT-PCR analysis. (D) CHX assay of TCF7 in *Usp21* WT and KO iKPC cells with MG132 treatment (n=3). (E) CHX assay of exogenous FLAG-tagged TCF7 in GFP and USP21 OE 293T cells (n=3). (F) CHX assay of exogenous K99R mutated TCF7 in GFP and USP21 OE 293T cells (n=2). For B-F, data are represented as mean  $\pm$  SD.

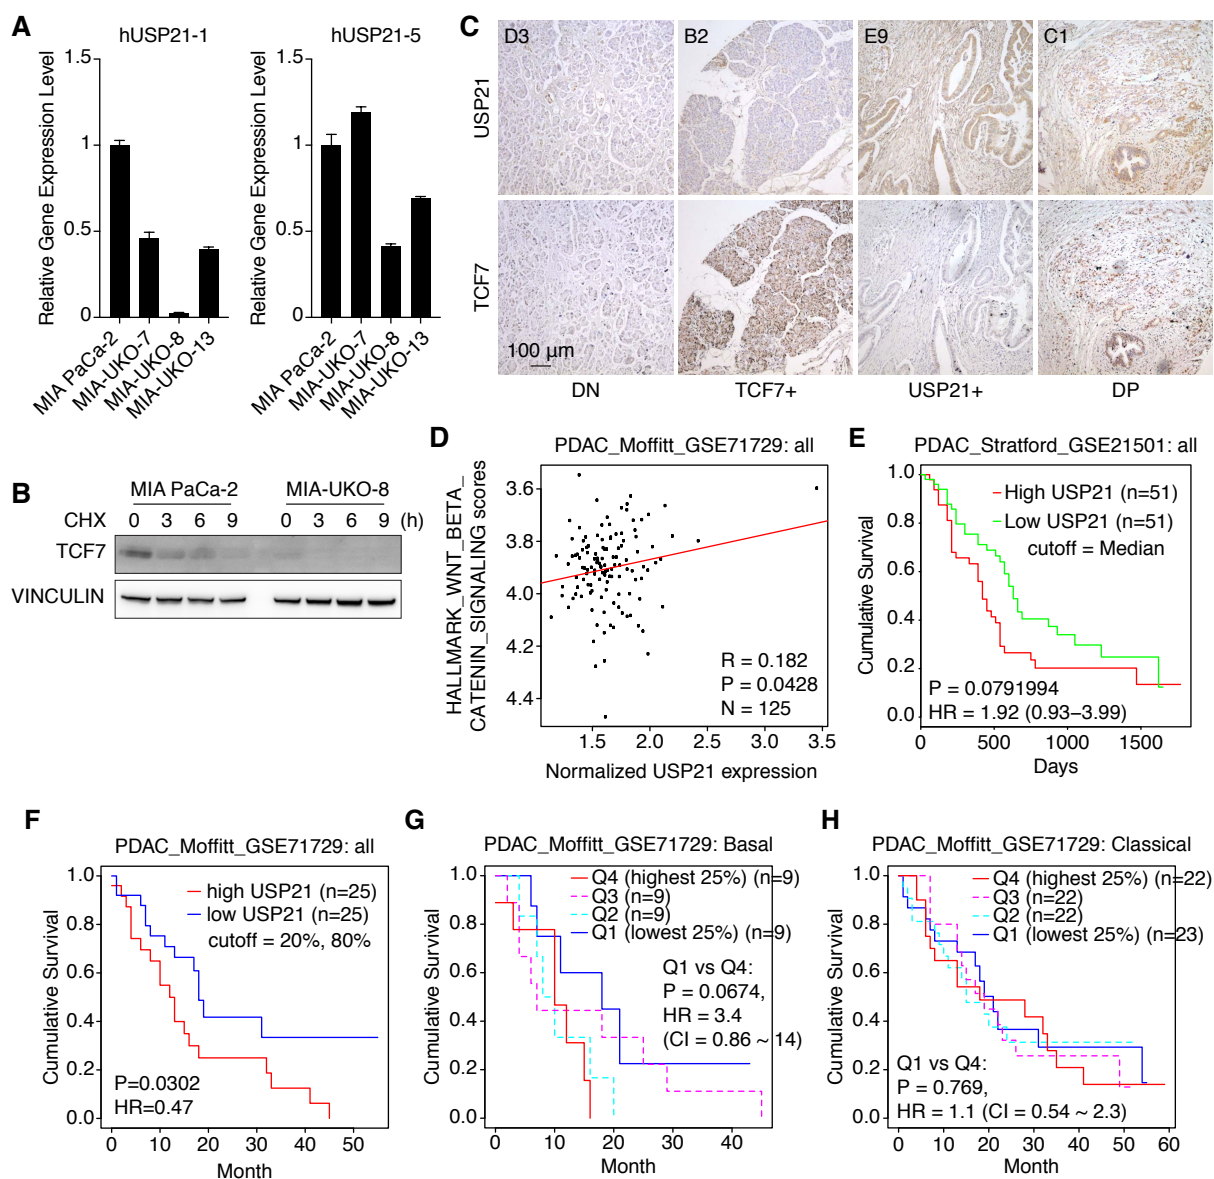

**Supplemental Fig. S6.** Correlation between USP21 and TCF7 in human PDAC samples. (A) Validation of *USP21* knockout in 3 MIA PaCa-2 single cell colonies by RT-PCR using 2 different primers. (B) CHX assay of TCF7 in *USP21* WT and KO Mia PaCa-2 cells. (C) Representative images of DN, TCF7+, USP21+ and DP human TMA samples (from left to right: inflammation, normal pancreas, PDAC, PDAC, respectively). (D) Correlation analysis of Hallmark of Wnt pathway gene signature and *USP21* expression in Moffitt PDAC dataset. (E, F) Kaplan-Meier survival analysis based on *USP21* expression in Stratford PDAC dataset (E) and Moffitt PDAC dataset (F). (G, H) Kaplan-Meier survival analysis based on *USP21* expression in basal-like subtype (G) and classical subtype (H) in Moffitt PDAC dataset.

**Supplementary Table 1. DNA sequence information of protein tags, sgRNA, primers and shRNA**

| ID                               | Gene ID      | Sequence                                                              | Note               |
|----------------------------------|--------------|-----------------------------------------------------------------------|--------------------|
| MAPKK nuclear export signal      |              | CTTCAAAAAAAAACTTGAAGAACTTGAACTT                                       |                    |
| SV40 nuclear localization signal |              | AGCCCAAAGAAGAAGAGAAAAGTAGAA                                           |                    |
| HA tag                           |              | TACCCATACGATGTTCCAGATTACGCT                                           |                    |
| FLAG tag                         |              | GACTACAAAGACGATGACGACAAG                                              |                    |
| USP21 sgRNA target               | NM_001014443 | GTTAATATCCAGCCCCGAGT                                                  | sgRNA              |
| hUSP21-1F                        | NM_001014443 | TAATATCCAGCCCCGAGTGG                                                  | shRNA validation   |
| hUSP21-1R                        | NM_001014443 | TAACATGGGGTTTGGCCCAG                                                  | shRNA validation   |
| hUSP21-5F                        | NM_001014443 | AGCCACCTGTTAATATCCAGCC                                                | shRNA validation   |
| hUSP21-5R                        | NM_001014443 | CAGAGGTCGTAACATGGGGT                                                  | shRNA validation   |
| TCF7-K52R-F                      | XM_006532800 | CCTGGCAGAGCTCAGGTCCTCACTGGTGA                                         | TCF7 site mutation |
| TCF7-K52R-R                      | XM_006532800 | TCACCAGTGAGGACCTGAGCTCTGCCAGG                                         | TCF7 site mutation |
| TCF7-K99R-F                      | XM_006532800 | GAGACTTTTCCCGGACAGACTTCCAGAGTCC                                       | TCF7 site mutation |
| TCF7-K99R-R                      | XM_006532800 | GGGACTCTGGAAGTCTGTCCGGGAAAAGTCTC                                      | TCF7 site mutation |
| TCF7-K277R-F                     | XM_006532800 | GCCCTCCTCAGGGAGGCAGGAGCTG                                             | TCF7 site mutation |
| TCF7-K277R-R                     | XM_006532800 | CAGCTCCTGCCTCCCTGAGGAGGGC                                             | TCF7 site mutation |
| TCF7-K406R-F                     | XM_006532800 | CGGTACTTACCCGGAGAGGGCCGCTGC                                           | TCF7 site mutation |
| TCF7-K406R-R                     | XM_006532800 | GCAGCGGCCCTCTCCGGGTAAGTACCG                                           | TCF7 site mutation |
| shRnf2-D4                        | NM_011277    | CCGGTGAGAAGCAGTACACCATTTACTCGA<br>GTAAATGGTGTACTGCTTCTCATTTTTG        | shRNA              |
| shRnf2-D7                        | NM_011277    | GTACCGGGTAATCTGTGCCATAAGATTTCT<br>CGAGAAATCTTATGGCACAGATTACTTTTT<br>G | shRNA              |

**Supplementary Table 2. Antibody information**

| Antibody                    | Application | Vendor            | Cat. #     |
|-----------------------------|-------------|-------------------|------------|
| USP21                       | IHC         | Sigma             | HPA028397  |
| USP21                       | WB          | Santa Cruz        | sc-79305   |
| CYCLOPHILIN A               | WB          | CST               | 2175s      |
| LAMIN B                     | WB          | CST               | 13823      |
| TCF7                        | WB, IHC     | CST               | 2203S      |
| TCF7                        | WB          | CST               | 2206S      |
| TCF7L2                      | WB          | CST               | 2269S      |
| ACTIN                       | WB          | Sigma             | A2228      |
| FLAG                        | IP, WB      | Sigma             | F1804      |
| HA                          | IP, WB      | BioLegend         | 901501     |
| HA                          | WB          | CST               | 3724s      |
| $\beta$ -CATENIN (active)   | WB          | CST               | 8814s      |
| $\beta$ -CATENIN (total)    | WB          | CST               | 8480       |
| DVL1                        | WB          | Santa Cruz        | sc-8025    |
| DVL2                        | WB          | CST               | 3224s      |
| DVL3                        | WB          | Santa Cruz        | sc-8027    |
| ubH2A                       | WB          | CST               | 8240s      |
| VINCULIN                    | WB          | Sigma             | V4505      |
| GFP                         | IHC         | abcam             | ab6673     |
| Ki67                        | IHC         | Thermo Scientific | RM-9106-S1 |
| Anti-rabbit IgG, HRP-linked | WB          | CST               | 7074s      |

|                            |    |        |         |
|----------------------------|----|--------|---------|
| Anti-mouse IgG, HRP-linked | WB | CST    | 7076s   |
| Rabbit anti-Goat IgG (H+L) | WB | Thermo | 61-1620 |
